# Supplementary material for: Circular RNA circBNC2 inhibits epithelial cell G2-M arrest to prevent fibrotic maladaptive repair
Source: PubMed Central journal article supplement (PMC9622807; doi:10.1038/s41467-022-34287-5), 2022-10-31
Supplement: 41467_2022_34287_MOESM1_ESM.pdf [file 41467_2022_34287_MOESM1_ESM.pdf]

# Circular RNA circBNC2 inhibits epithelial cell G2-M arrest to prevent fibrotic maladaptive repair

Peng Wang<sup>1</sup>, Zhitao Huang<sup>1</sup>, Yili Peng<sup>1</sup>, Hongwei Li<sup>1</sup>, Tong Lin<sup>1</sup>, Yingyu Zhao<sup>1</sup>, Zheng Hu<sup>1</sup>, Zhanmei Zhou<sup>1</sup>, Weijie Zhou<sup>1</sup>, Youhua Liu<sup>1</sup>, Fan Fan Hou<sup>1,2\*</sup>

<sup>1</sup>Division of Nephrology, Nanfang Hospital, Southern Medical University, State Key Laboratory of Organ Failure Research, National Clinical Research Center of Kidney Disease, Guangdong Provincial Key Laboratory of Renal Failure Research.

<sup>2</sup>Guangzhou Regenerative Medicine and Health Guangdong Laboratory, Guangzhou 510515, China

\* To whom correspondence should be addressed.

Fan Fan Hou, Division of Nephrology, Nanfang Hospital, Southern Medical University, [ffhouguangzhou@163.com](mailto:ffhouguangzhou@163.com)

## Supplementary data

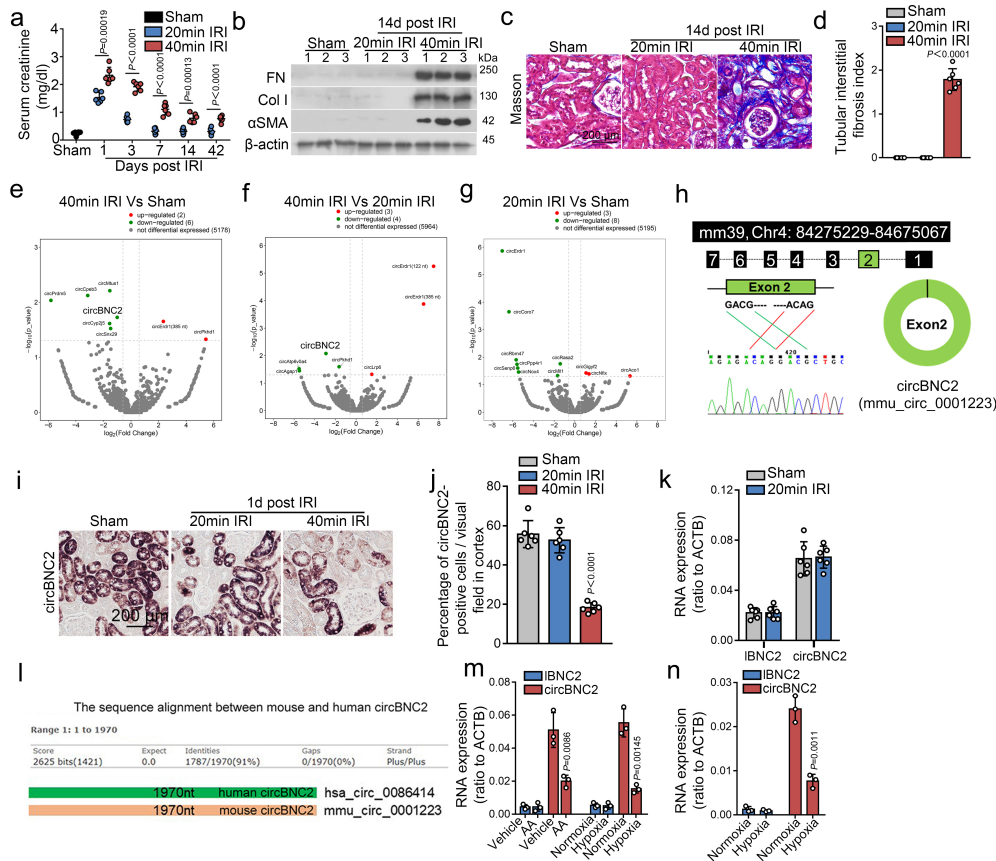

**Supplementary Fig.1 Downregulation of circBNC2 is observed in severe IRI but not in mild IRI**

**a** Changes of serum creatinine over time in IRI mouse (n=6 in each group). **b** Western blots showing fibronectin (FN), collagen I (Col I) and  $\alpha$ SMA expression in kidney homogenates at day 14 post IRI. **c, d** Representative images (**c**) and quantification data (**d**) of Masson's trichrome staining in kidneys from mice subjected to mild (20-min ischemia) or severe (40-min ischemia) IRI at day 14 post injury. **e-g** Volcano plots showing the differentially expressed circRNAs in severe IRI V.s. Sham (**e**), severe IRI V.s. mild IRI (**f**) or mild IRI V.s. Sham (**g**). **h** The genomic localization and circBase ID for circBNC2. The backsplice junction site of circBNC2 was identified by Sanger sequencing. **i, j** Representative images (**i**) and quantification data (**j**) of *in situ* hybridization in kidney section from mice subjected to mild or severe IRI at day 1 post IRI. **k** RT-PCR showing circBNC2 and IBNC2 expression in mouse kidney at day 1 post mild IRI. **l** sequences of circBNC2 showing highly homologous (91%) between human and mouse. **m** qRT-PCR showing circBNC2 and IBNC2 expression in mouse TECs (mTECs) exposed to AA or hypoxia for 24 hours. **n** qRT-PCR showing circBNC2 and IBNC2 expression in 24-hour hypoxia-treated human hepatocytes (L-02). For **a, d, j, k**, n=6 mice in each group, for **m, n**, n=3 biologically independent cells. Data are expressed as means  $\pm$  SD. Two-sided T-test was used for the comparison of two groups (**a, k, m, n**). One-way ANOVA with Bonferroni post hoc test was used for comparison among multiple groups (**d, j**). Source data are provided as a Source Data file.

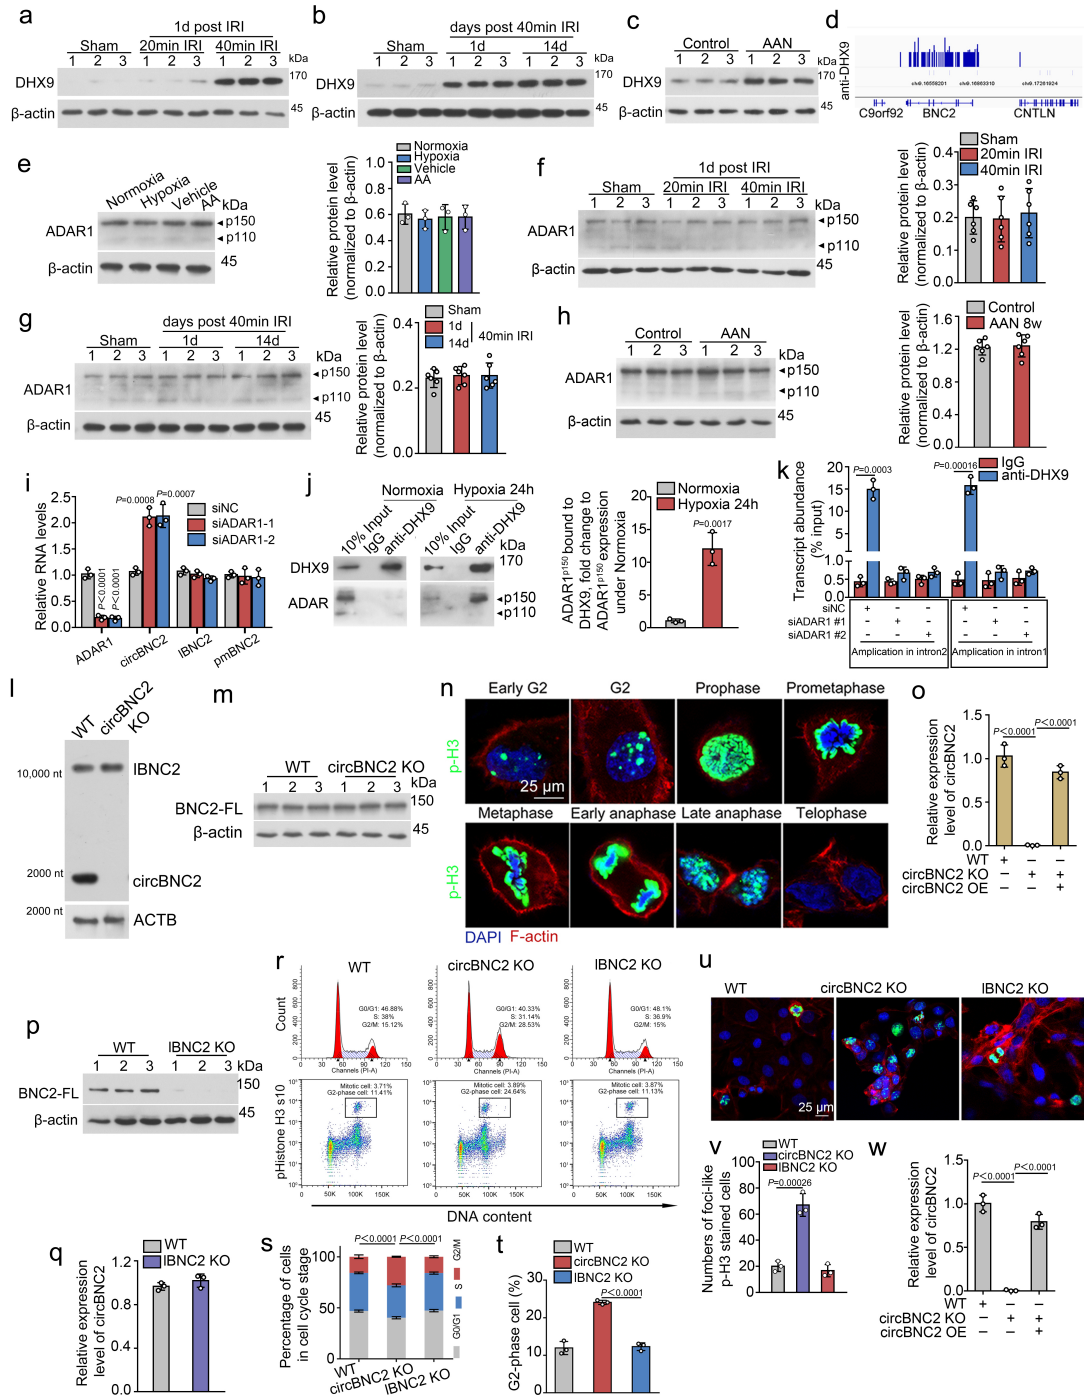

## Supplementary Fig. 2 DHX9 interacts with ADAR1 to inhibit circBNC2 expression in injured TECs

**a-c** Western blots showing DHX9 expression in kidney from mice treated with severe IRI (**a**, **b**) and AA (**c**) ( $n=6$  in each group). **d** Cross-linking-immunoprecipitation sequencing data showed the DHX9 binding sites within the introns of BNC2 pre-mRNA, according to the online CLIP-seq data. **e** Representative images of Western

blots and quantitative data showing the expression of ADAR1 in human TECs treated with hypoxia or aristolochic acids (AA) for 24 hours. **f** Representative images of Western blots and quantitative data showing the expression of ADAR1 in kidney homogenates from mice treated with mild or severe IRI at day 1 post injury (n=6 in each group). **g** Representative images of Western blots and quantitative data showing the expression of ADAR1 in kidney homogenates from mice treated with severe IRI at day 1 and day 14 post injury (n=6 in each group). **h** Representative images of Western blots and quantitative data showing the expression of ADAR1 in kidney homogenates from mice treated with AA at week 8 post injury (n=6 in each group). **i** qRT-PCR showing ADAR1, circBNC2, IBNC2 and pre-mRNA of BNC2 (pmBNC2) expression in 24 hours hypoxia-treated HK2 cells transfected with siRNAs targeting ADAR1. **j** Co-immunoprecipitation assays followed by Western blots showing that p150 isoform of ADAR1 bound to DHX9 in cell lysates from human TECs treated with hypoxia for 24 hours, and the quantification data. **k** RNA immunoprecipitation with anti-DHX9 in lysates from HK2 cells treated with hypoxia for 24 hours, followed by qRT-PCR assay. **l** Northern blot with probe targeting exon 2 of BNC2 showing expression of circBNC2 and IBNC2 in circBNC2-KO HK2 cells. **m** Representative images of Western blots showing the expression of full length BNC2 protein (BNC2-FL) in circBNC2-KO HK2 cells. **n** Chromatin patterns of TECs shown with immunostaining of antibody against p-Histone H3 *in vitro*. **o** qRT-PCR showing circBNC2 expression in circBNC2-KO HK2 cells transfected with circBNC2 plasmids. **p** Western blots showing the depletion of BNC2-FL protein in IBNC2-KO HK2. **q** qRT-PCR showing circBNC2 expression in IBNC2-KO HK2 cells. **r-t** Cell cycle analysis by flow cytometry in HK2 cells, showing knockout of circBNC2 induced G2/M cell cycle arrest (**r, s**), especially G2 phase cell (**t**), while depleting BNC2 protein had no effect on cell cycle regulation. **u, v** Immunofluorescence staining for p-H3 in circBNC2-KO HK2 cells showing increase in G2-phase positive cells (**u**) and the quantification data (**v**), while depleting BNC2 protein had no effect on G2-phase cell cycle arrest. **w** qRT-PCR showing circBNC2 expression in circBNC2-KO L-02 cells transfected with circBNC2 plasmids. For **e, i, j,**

**o, q, s, t, v, w**, n=3 biologically independent cells. For **f, g, h**, n=6 mice in each group. Data are expressed as means  $\pm$  SD. Two-sided T-test was used for the comparison of two groups (**e, h, j, k, q, t**). One-way ANOVA with Bonferroni post hoc test was used for comparison among multiple groups (**f, g, i, o, s, v, w**). Source data are provided as a Source Data file.

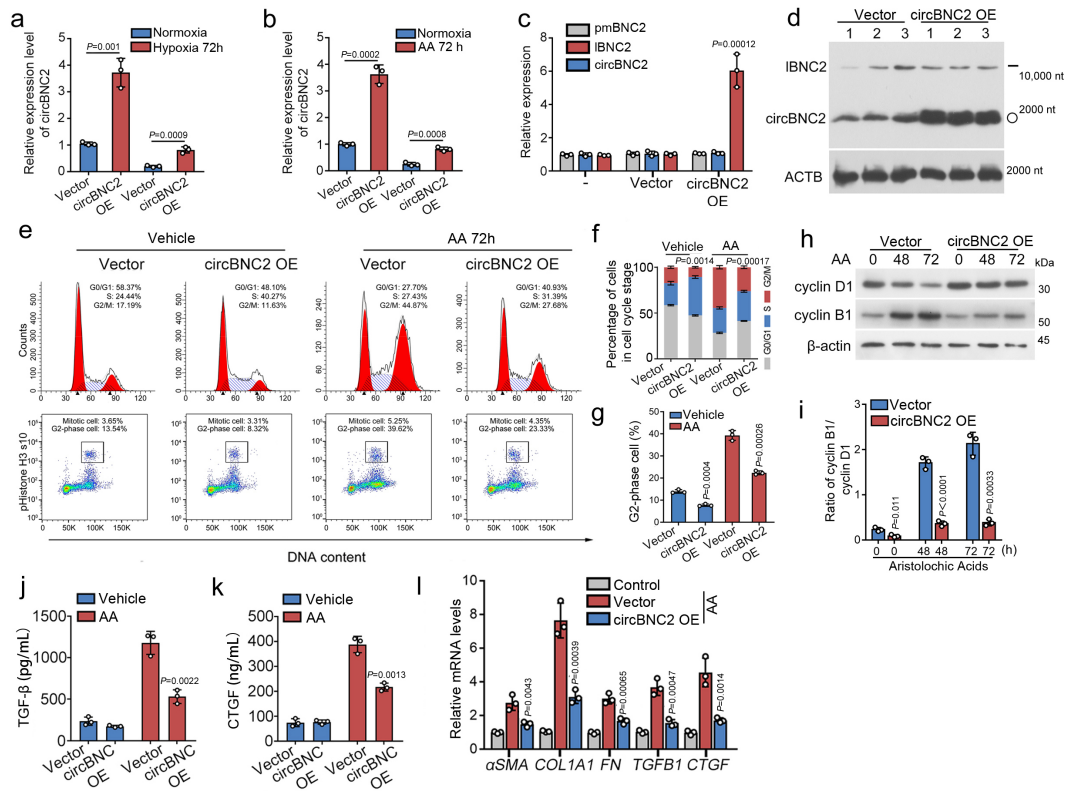

### Supplementary Fig.3 Ectopic expression of circBNC2 attenuates epithelial cell G2/M arrest after exposure to aristolochic acids

**a&b** qRT-PCR showing efficacy of circBNC2 overexpression in HK2 cells treated with hypoxia (**a**) or AA (**b**) for 72 hours. **c** qRT-PCR showing expression levels of circBNC2, IBNC2 and pre-mRNA of BNC2 in HK2 cells transfected with circBNC2 overexpression lentivirus. **d** Northern blot with probe targeting exon 2 of BNC2 showing efficacy of circBNC2 transfection in HK2 cells. **e-g** Cell cycle analysis by flow cytometry in HK2 cells, showing overexpression of circBNC2 reduces G2/M cell cycle arrest induced by 72-hour AA treatment (**e, f**), especially G2 phase cell cycle

arrest (**g**). **h, i** Western blots showing the expression of cyclin B1 and cyclin D1 (**h**) and the quantification of cyclin B1/ cyclin D1 (**i**). **j, k** Levels of TGF- $\beta$ 1 (**j**) and CTGF (**k**) in culture medium, examined by ELISA, in AA-treated HK2 cells overexpressed with circBNC2. **l** qRT-PCR showing mRNA levels of profibrotic factors expression in AA-treated HK2 cells transfected with circBNC2 overexpression lentivirus. For **a-c, f, g, i-l**, n=3 biologically independent cells. Data are expressed as means  $\pm$  SD. Two-sided T-test was used for the comparison of two groups (**a, b, f, g, i, j, k**). One-way ANOVA with Bonferroni post hoc test was used for comparison among multiple groups (**c, l**). Source data are provided as a Source Data file.

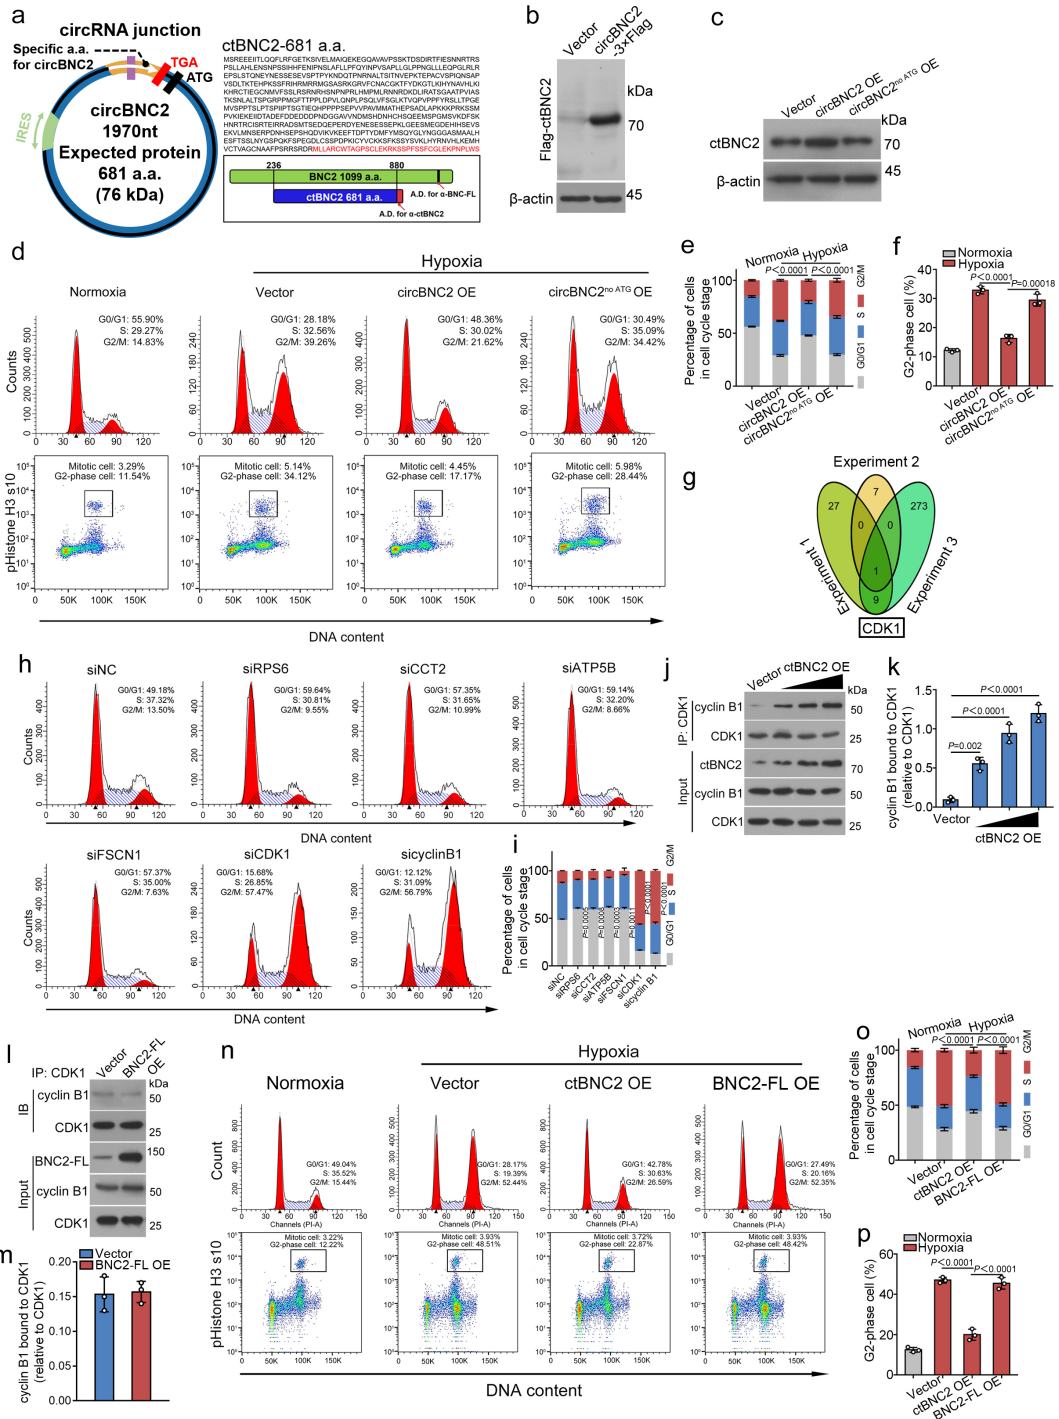

## Supplementary Fig.4 circBNC2 encodes a 681-amino acid protein

**a** The amino acid sequence of the predicted 681-aa protein encoded by circBNC2 and the antigenic determinant (A.D.) for anti-ctBNC2 and anti-BNC2-FL. **b** Western blots showing FLAG-tagged-ctBNC2 in HK2 cells transfected with circBNC2-FLAG plasmid. **c** Western blots showing ctBNC2 in HK2 cells transfected with circBNC2 or circBNC2<sup>no ATG</sup> lentivirus. **d-f** Cell cycle analysis by flow cytometry in HK2 cells,

showing overexpression of circBNC2, but not circBNC2<sup>no ATG</sup>, reduced 72-hour hypoxia-induced G2/M cell cycle arrest (**d, e**), especially G2 phase cell cycle arrest (**f**). **g** A Venn diagram showing the intersection presenting 1 protein (CDK1) bound to BNC2-FL in three replicated experiments. **h, i** Cell cycle analysis by flow cytometry in HK2 cells showed that knockdown of CDK1 or cyclin B1 induced G2/M cell cycle arrest, while knockdown of RPS6, CCT2, ATP5B or FSCN1 induced mild G0/G1 cell cycle arrest. **j, k** Interaction of CDK1 with cyclin B1 was increased by overexpressing ctBNC2 in 24-hour hypoxia-treated HK2 cells in a dose-dependent manner, as shown by Immunoprecipitation assay followed by Western blots. **l, m** Immunoprecipitation assay followed by Western blots showed that overexpressing BNC2-FL in 24-hour hypoxia-treated HK2 cells had no effect on the interaction of CDK1 with cyclin B1. **n-p** Cell cycle analysis by flow cytometry in HK2 cells, showing overexpression of ctBNC2, but not BNC2-FL, reduced 72-hour hypoxia-induced G2/M cell cycle arrest in HK2 cells (**n, o**), especially G2 phase cell cycle arrest (**p**). For **e, f, k, m, o, p**, n=3 biologically independent cells. Data are expressed as means  $\pm$  SD. Two-sided T-test was used for the comparison of two groups (**i, m**). One-way ANOVA with Bonferroni post hoc test was used for comparison among multiple groups (**e, f, k, o, p**). Source data are provided as a Source Data file.



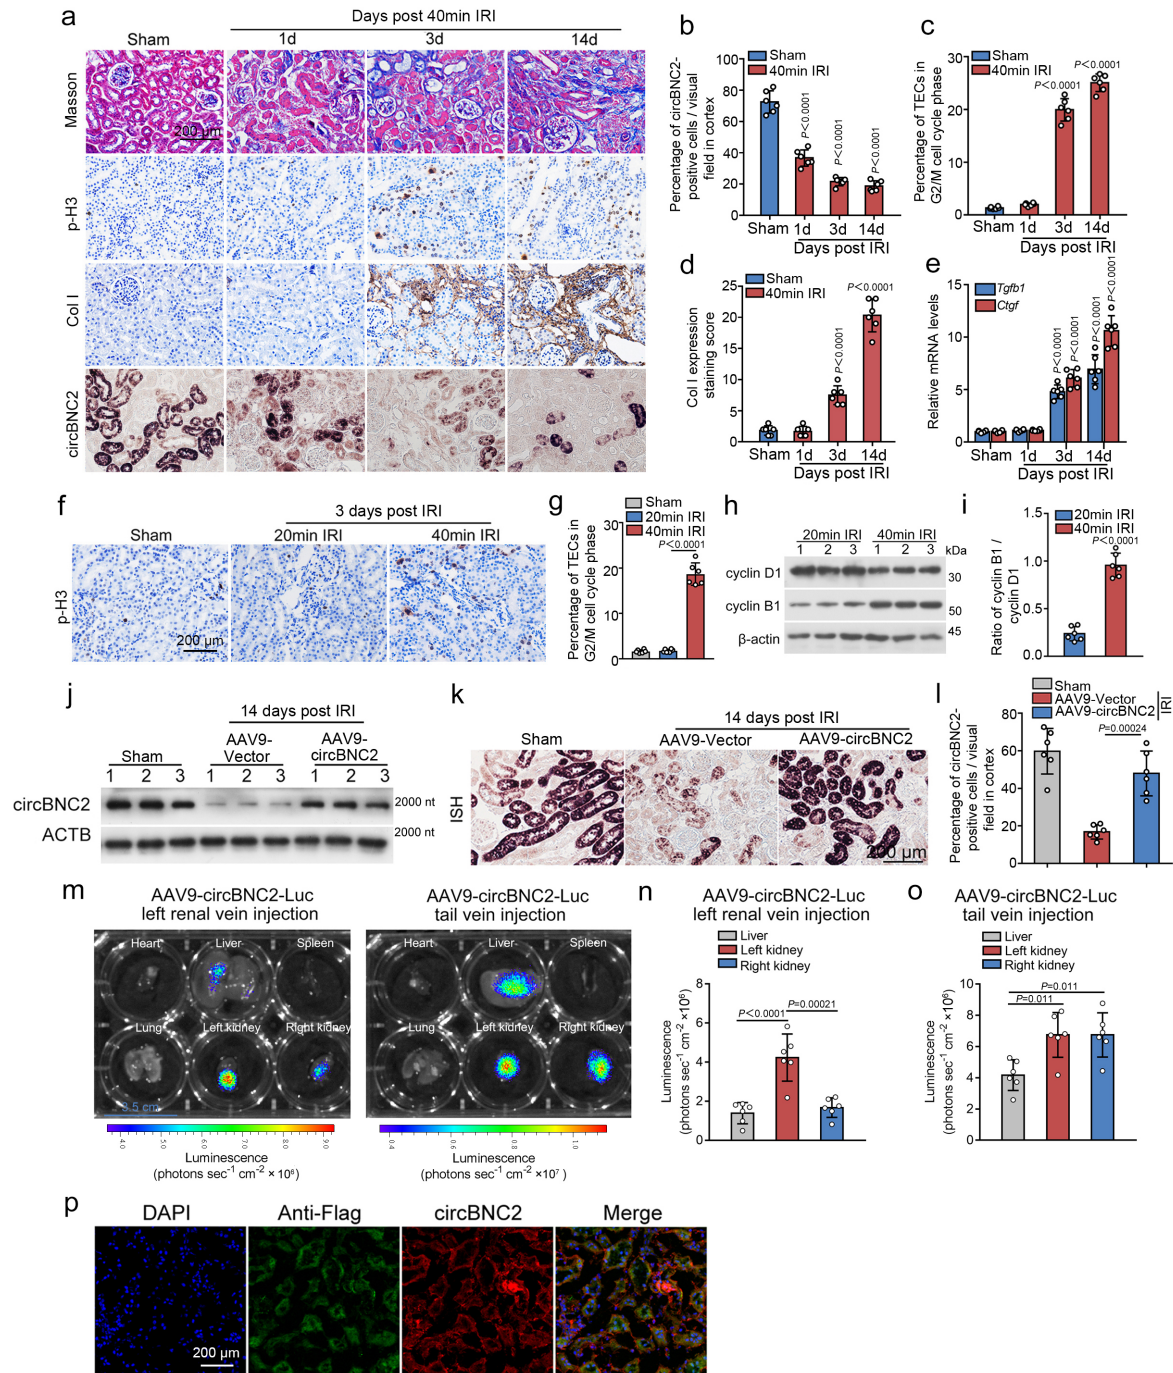

## Supplementary Fig.5 circBNC2 alleviates fibrotic maladaptive repair in kidney after injury

**a-d** Representative images showing Masson staining, *in situ* hybridization of circBNC2, immunohistochemistry of p-H3 and Col I in kidney sections from mice treated with severe IRI (**a**) and the semi-quantitative data (**b-d**). **e** qRT-PCR assays showing mRNA levels of *Tgfb1* and *Ctgf* in kidney homogenates from mice treated with 40-min IRI. **f**,

**g** Representative photos showing expression of p-H3 in kidneys from mice treated with mild IRI or severe IRI (**f**) and the quantification data (**g**). **h, i** Western blots showing the expression of cyclin B1 and cyclin D1 (**h**) and the quantification of cyclin B1/ cyclin D1(**i**). **j** Northern blot with circBNC2 specific probe showing circBNC2 expression in IRI mice administrated with AAV9-circBNC2. **k, l** Representative images of *in situ* hybridization of circBNC2 expression in kidneys from IRI mice treated with AAV9-circBNC2 (**k**) and the percentage of circBNC2-positive TECs in renal cortex (**l**). **m-o** Representative images of luminescent imaging for kidney, heart, liver, lung and spleen from mice treated with AAV9-luciferase-circBNC2 through the left renal vein or tail vein (**m**) and quantification data for the photon intensities in the organs (**n, o**). **p** Representative images of Fluorescence *in situ* hybridization for circBNC2 followed by immunofluorescence for FLAG in renal sections from mice treated with AAV9-FLAG-circBNC2 through the left renal vein. For **b-e, g, i, l, n, o**, n=6 in each group. Data are expressed as means  $\pm$  SD. Two-sided T-test was used for the comparison of two groups (**i**). One-way ANOVA with Bonferroni post hoc test was used for comparison among multiple groups (**b, c, d, e, g, l, n, o**). Source data are provided as a Source Data file.

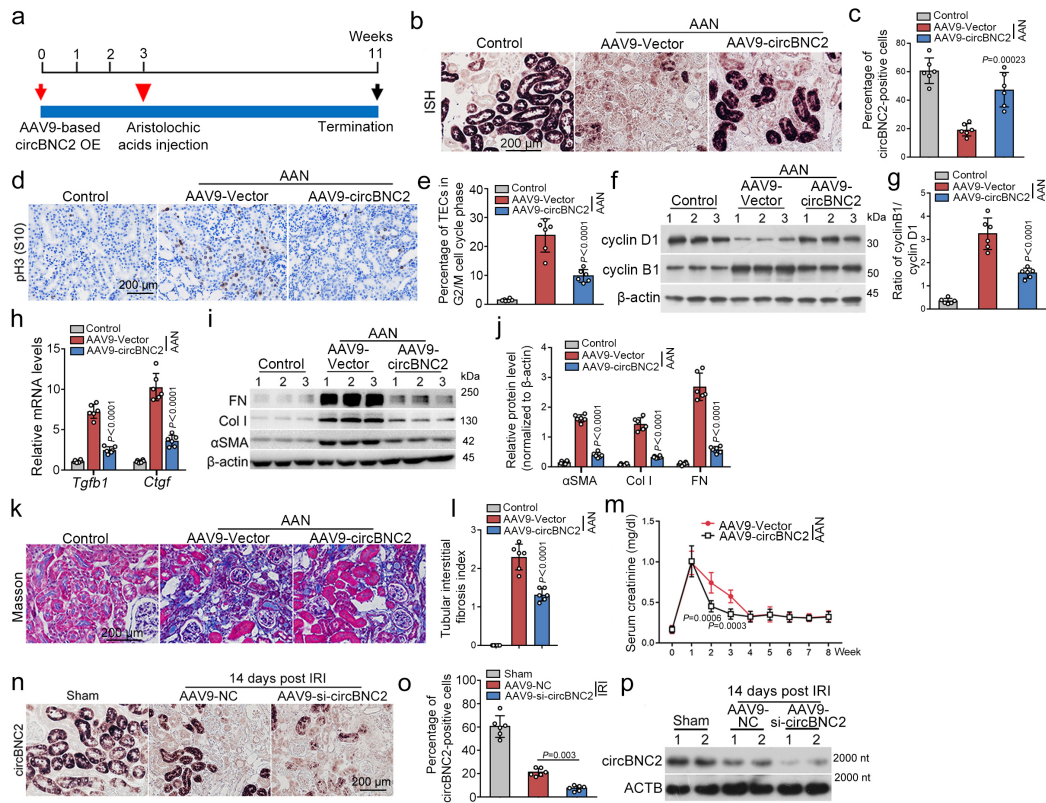

## Supplementary Fig.6 Exogenous expression of circBNC2 alleviates fibrotic maladaptive repair in kidney after exposure to aristolochic acids

a Mice were treated by tail vein injection of either AAV9-circBNC2 or AAV9-Vector at 21 days before establishing AA nephropathy (AAN) model. Mice were euthanized 8 weeks post AAN model establishment (n=6 mice in each group). **b, c** Representative images of fluorescence *in situ* hybridization of circBNC2 expression in kidneys from AAN mice delivered with AAV9-circBNC2 (**b**) and the quantification data (**c**). **d, e** Representative images of Immunohistochemistry of p-H3 in AA-treated kidneys from AAN mice overexpressed with circBNC2 (**d**), and the quantification data (**e**). **f, g** Western blots showing expression of cyclin B1 and cyclin D1 in kidney homogenates from AAN mice overexpressed with circBNC2 (**f**), and the quantification data (**g**). **h** qRT-PCR showing the expression of *Tgfb1* and *Ctgf* in homogenates of kidney from AAN mice overexpressed with circBNC2. **i, j** Western blots showing expression of FN, collagen I and  $\alpha$ SMA in kidneys from AAN mice treated with AAV9-circBNC2 (**i**), and the quantification data (**j**). **k, l** Masson staining of kidney sections from AAN mice

treated with AAV9-circBNC2 or AAV9-Vector (**k**), and the quantification data (**l**). **m** Administration of AAV-circBNC2 in AAN mice decreased the levels of serum creatinine at week 2 and 3, as compared to AAN mice treated with AAV9 vector. **n, o** Representative images of *in situ* hybridization of circBNC2 expression in kidneys from IRI mice delivered with AAV9-si-circBNC2 (**n**) and the quantification data (**o**). **p** Northern blot showing circBNC2 expression in IRI mice treated with AAV9-si-circBNC2 or AAV9-NC. For **c, e, g, h, j, l, m, o**, n=6 in each group. Data are expressed as means  $\pm$  SD. Two-sided T-test was used for the comparison of two groups (**m**). One-way ANOVA with Bonferroni post hoc test was used for comparison among multiple groups (**c, e, g, h, j, l, o**). Source data are provided as a Source Data file.

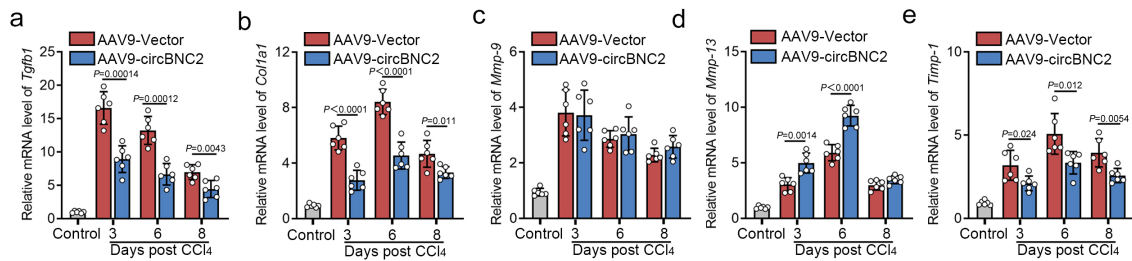

### Supplementary Fig.7 Expression levels of fibrotic and fibrolytic genes in circBNC2 overexpressed mice following acute liver injury

**a-e** qRT-PCR assays showed that overexpressing circBNC2 reduced the mRNA levels of profibrotic factors, such as *Tgfb1*, *Col1a1* and *Timp-1*, and increased the mRNA level of *Mmp-13* at day 3, 6 and 8 post a single treatment of CCl<sub>4</sub> (n=6 in each group). Data are expressed as means  $\pm$  SD. Two-sided T-test was used for the comparison of two groups. Source data are provided as a Source Data file.

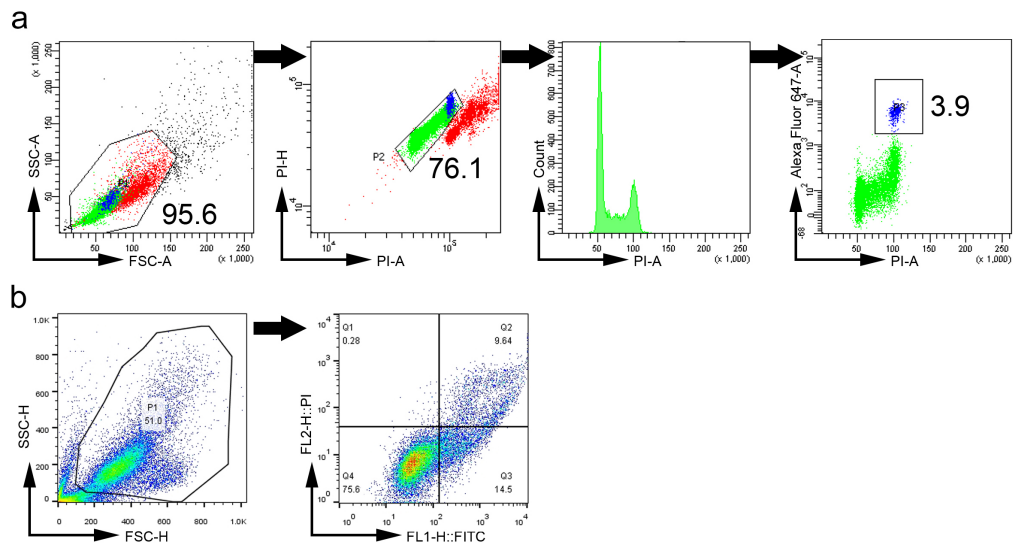

**Supplementary Fig.8 Gating strategy for Flow Cytometry analysis**

**a** Representative gating strategy for analyzing the G2/M cell cycle arrest. **b** Representative gating strategy for analyzing the apoptotic cells.

**Supplementary Table 1. Sequences of truncated mutations of ctBNC2**

| <b>Amino acids<br/>(aa) of<br/>ctBNC2</b> | <b>Sequence</b>                                                                                                                                                                                                                                                                                                                                                                                                                                                                                                                                                                                                                                                                                                  |
|-------------------------------------------|------------------------------------------------------------------------------------------------------------------------------------------------------------------------------------------------------------------------------------------------------------------------------------------------------------------------------------------------------------------------------------------------------------------------------------------------------------------------------------------------------------------------------------------------------------------------------------------------------------------------------------------------------------------------------------------------------------------|
| <b>1-200 aa</b>                           | MSREEEITLQQFLRFGETKSIVELMAIQEKEGQAVAVPSSKTDSDIRTFIESN<br>NRTRSPSLLAHLNSNPSSIIHFENIPNSLAFLLPFYINPVSAPLLGLPPNGL<br>LLEQPGLRLREPSLSTQNEYNESESEVSPPTYKNDQTPNRNALTSITNVEP<br>KTEPACVSPIQNSAPVSDLTKTEHPKSSFRIHRMRRMGSA                                                                                                                                                                                                                                                                                                                                                                                                                                                                                                 |
| <b>201-400 aa</b>                         | SRKGRVFCNACGKTFYDKGTLKIHYNVHLKIKHRCTIEGCNMVFSSLRSR<br>NRHSANPNPRLHMPMLRNNRDKDLIRATSGAATPVIASSTKSNLALTSPGRP<br>PMGFTTPPLDPVLQNPLPSQLVFSGLKTVQVPPFYRSLLTGEMVSPPTSL<br>PTSPIIPTSGTIEQHPPPPSEPVVPAVMMATHEPSADLAPKKKPRK                                                                                                                                                                                                                                                                                                                                                                                                                                                                                               |
| <b>401-645 aa</b>                         | SSMPVKIEKEIIDTADEFDDEDDDDPNDGGAVVNDMSHDNHCHSQEEMSPG<br>MSVKDFSKHNRTRCISRTEIRRADSMTSEDQEPERDYENESESEPKLGEES<br>MEGDEHIHSEVSEKVLNNSERPDENHSEPSHQDVIKVKKEEFTDPTYDMFY<br>MSQYGLYNGGGASMAALHESFTSSLNYGSPQKFSPEGDLCSPPDPKICYVC<br>KKSFKSSYSVKLHYRNVHLKEMHVCTVAGCNAAFPSRRSRDR                                                                                                                                                                                                                                                                                                                                                                                                                                           |
| <b>401-481 aa</b>                         | SSMPVKIEKEIIDTADEFDDEDDDDPNDGGAVVNDMSHDNHCHSQEEMSPG<br>MSVKDFSKHNRTRCISRTEIRRADSMTSEDQEPERDYENESESEPKLGEES<br>MEGDEHIHSEVSEKVLNNSERPDENHSEPSHQDVIKVKKEEFTDPTYDMFY<br>MSQYGLYNGGGASMAALHESFTSSLNYGSPQKFSPEGDLCSPPDPKICYVC<br>KKSFKSSYSVKLHYRNVHLKEMHVCTVAGCNAAFPSRRSRDRMLLARCW<br>TAGPSCLEKRKSSPFSSFCGLEKPNPLWS                                                                                                                                                                                                                                                                                                                                                                                                   |
| <b>1-645 aa</b>                           | MSREEEITLQQFLRFGETKSIVELMAIQEKEGQAVAVPSSKTDSDIRTFIESN<br>NRTRSPSLLAHLNSNPSSIIHFENIPNSLAFLLPFYINPVSAPLLGLPPNGL<br>LLEQPGLRLREPSLSTQNEYNESESEVSPPTYKNDQTPNRNALTSITNVEP<br>KTEPACVSPIQNSAPVSDLTKTEHPKSSFRIHRMRRMGSA<br>SRKGRVFCNACGKTFYDKGTLKIHYNVHLKIKHRCTIEGCNMVFSSLRSRNRHSANPNPRL<br>HMPMLRNNRDKDLIRATSGAATPVIASSTKSNLALTSPGRPPMGFTTPPLDP<br>VLQNPLPSQLVFSGLKTVQVPPFYRSLLTGEMVSPPTSLPTSPIIPTSGTIE<br>QHPPPPSEPVVPAVMMATHEPSADLAPKKKPRKSSMPVKIEKEIIDTADEFD<br>DEDDDDPNDGGAVVNDMSHDNHCHSQEEMSPGMSVKDFSKHNRTRCISRT<br>EIRRADSMTSEDQEPERDYENESESEPKLGEESMEGDEHIHSEVSEKVLN<br>NSERPDENHSEPSHQDVIKVKKEEFTDPTYDMFYMSQYGLYNGGGASMAA<br>LHESFTSSLNYGSPQKFSPEGDLCSPPDPKICYVC<br>KKSFKSSYSVKLHYRNVHLKEMHVCTVAGCNAAFPSRRSRDR |
| <b>1-681 aa</b>                           | MSREEEITLQQFLRFGETKSIVELMAIQEKEGQAVAVPSSKTDSDIRTFIESN<br>NRTRSPSLLAHLNSNPSSIIHFENIPNSLAFLLPFYINPVSAPLLGLPPNGL<br>LLEQPGLRLREPSLSTQNEYNESESEVSPPTYKNDQTPNRNALTSITNVEP                                                                                                                                                                                                                                                                                                                                                                                                                                                                                                                                             |

KTEPACVSPIQNSAPVSDLTKTEHPKSSFRIHRMRRMGASARKGRVFCNAC  
GKTFYDKGTLKIHYNVHLKIKHRCTIEGCNMVFSSLRSRNRHSANPNPRL  
HMPMLRNNRDKDLIRATSGAATPVIASSTKSNLALTSPGRPPMGFTTTPPLDP  
VLQNPLPSQLVFSGLKTVQVPPFYRSLTTPGEMVSPPTSPLTSPPIPTSGTIE  
QHPPPPSEPVVPAVMMATHEPSADLAPKKKPRKSSMPVKIEKEIIDTADEFD  
DEDDDPNDGGAVVNDMSHDNHCHSQEEMSPGMSVKDFSKHNRTRCISRT  
EIRRADSMSEDQEPERDYENESESEPKLGEESMEGDEHIHSEVSEKVLN  
NSERPDENHSEPSHQDVIVKKEEFTDPTYDMFYMSQYGLYNGGGASMAA  
LHESFTSSLNYGSPQKFSPEGDLCSSPDPKICYVCKKSKSSYSVKLHYRNV  
HLKEMHVCTVAGCNAAFPSRRSRDRMLLARCWTAGPSCLEKRKSSPFSSF  
CGLEKPNPLWS

**Supplementary Table 2. Primers, Probes and oligos used in this study.**

| Primer/<br>Probes/<br>oligos | Species | Sequence (5' to 3')                                                    | Amplified<br>product<br>(bp) |
|------------------------------|---------|------------------------------------------------------------------------|------------------------------|
| circBNC2                     | Human   | Forward: AAAGAGATGCACGTCTGCAC<br>Reverse: GCAGAAACTGCTGAAGGGTG         | 147                          |
| IBNC2                        | Human   | Forward: GCTCTGCCACTTCTGTCAT<br>Reverse: GGCGCTTTCTCCCTCTCTTT          | 125                          |
| pmBNC2                       | Human   | Forward: AGGAATGGAAAGCTTGAGGGTT<br>Reverse: AAAAAGCAAAGCCATGAGCCC      | 111                          |
| circBNC2                     | Mouse   | Forward: AAAAGAGATGCACGTCTGCAC<br>Reverse: GCAGAAACTGCTGAAGGGTG        | 148                          |
| IBNC2                        | Mouse   | Forward: CCCAGAACGGACACTCCAAA<br>Reverse: AGTGTAGACACAGAGGCACA         | 129                          |
| ACTB                         | Human   | Forward: CATTCCAAATATGAGATGCGTTGT<br>Reverse: GCATTACATAATTTACACGAAAGC | 148                          |
| ACTB                         | Mouse   | Forward: TGAGCTGCGTTTTTACACCCT<br>Reverse: GTTTGCTCCAACCAACTGCT        | 221                          |
| DHX9                         | Human   | Forward: CGGTATGGAGATGGTCCACG<br>Reverse: CGCTACCATAGCCTCCACTG         | 130                          |
| ADAR1                        | Human   | Forward: CACTTCCAGTGCGGAGTAGC<br>Reverse: GGTGTAGTATCCGCTGAGGG         | 157                          |
| TGF- $\beta$                 | Human   | Forward: GCACCTTGGGCACTGTTGAA<br>Reverse: TCCCCACTAAAGCAGGTTC          | 169                          |
| CTGF                         | Human   | Forward: AGGATGTGCATTCTCCAGCC<br>Reverse: AAGTGGGGCTACCATTCTACT        | 135                          |
| $\alpha$ SMA                 | Human   | Forward: GCTGCCAGAGACCCTGTT<br>Reverse: TTTCATGGATGCCAGCAGACT          | 63                           |
| COL1A1                       | Human   | Forward: GATCTGCGTCTGCGACAAC<br>Reverse: GGCAGTTCTTGGTCTCGTCA          | 68                           |
| SNAIL                        | Human   | Forward: TCGGAAGCCTAACTACAGCGA                                         | 140                          |

|                                                                  |       |                                                                     |     |
|------------------------------------------------------------------|-------|---------------------------------------------------------------------|-----|
|                                                                  |       | Reverse: AGATGAGCATTGGCAGCGAG                                       |     |
| FN1                                                              | Mouse | Forward: TGTGATCCCCATGAAGCAACG<br>Reverse: CTCCGAAACACGTGCAGGA      | 109 |
| TGF- $\beta$                                                     | Mouse | Forward: AGCTGCGCTTGCAGAGATTA<br>Reverse: TGCCGTACAACCTCCAGTGAC     | 157 |
| MMP-13                                                           | Mouse | Forward: ACCCAGCCCTATCCCTTGAT<br>Reverse: GGTCACGGGATGGATGTTCA      | 180 |
| MMP-9                                                            | Mouse | Forward: GCGTCATTCGCGTGGATAAG<br>Reverse: CCTGGTTCACCTCATGGTCC      | 156 |
| TIMP-1                                                           | Mouse | Forward: ACACCCCAGTCATGGAAAGC<br>Reverse: CTCAGAGTACGCCAGGGAAC      | 142 |
| COL1A1                                                           | Mouse | Forward: CCCCTCAACCCCGTCTACTT<br>Reverse: ACAGTCCAAGAACCCCATGTC     | 70  |
| $\alpha$ SMA                                                     | Mouse | Forward: CCCAGACATCAGGGAGTAATGG<br>Reverse: TCTATCGGATACTTCAGCGTCA  | 104 |
| circPrdm5                                                        | Mouse | Forward: AAGAGGCTCGATCAAGTGGG<br>Reverse: TGGTCAGAGCTTGTTGCTCC      | 235 |
| circCpeb3                                                        | Mouse | Forward: GCGCTTTGTGCAACTTCAAC<br>Reverse: ATCCTTGATGGTTGGGCTGG      | 153 |
| circMtus1                                                        | Mouse | Forward: AGAACCCCTAGGCTCCGACAG<br>Reverse: CGCGATCCATCTTCTGTCCT     | 265 |
| circSnx29                                                        | Mouse | Forward: GTCCAGGCACTGGCCAGATGA<br>Reverse: GGCATGGCGCTCCTGCTGTT     | 187 |
| circCyp2j5                                                       | Mouse | Forward: AATGCAAAAGCTCTACAATGGC<br>Reverse: GGGTTCCAATCTTTCTCGTGTTT | 138 |
| circPkhd1                                                        | Mouse | Forward: TCTTGATCTCTGGGTCAAACCTG<br>Reverse: CAGGGTTCTGAGGGGAGACC   | 231 |
| circErdr1                                                        | Mouse | Forward: AGATGTATGTGCCACCGACC<br>Reverse: TCCTACCTTGTTGGAGTCCGT     | 191 |
| primer pair c<br>(intron 1) for<br>DHX9 RIP<br>assay             | Human | Forward: AGGAATGGAAAGCTTGAGGGTT<br>Reverse: AAAAAGCAAAGCCATGAGCCC   | 111 |
| primer pair b<br>(intron 1) for<br>DHX9 RIP<br>assay             | Human | Forward: TCTACACGGCCTGCCAAATC<br>Reverse: AGGAACAGCGAAGAAGCCAG      | 150 |
| primer pair a<br>(exon 3 and<br>exon 4) for<br>DHX9 RIP<br>assay | Human | Forward: GTAAACATGGCTGGGTGGCA<br>Reverse: AGGATCTTTAGCCGCACAGG      | 157 |
| primer pair d                                                    | Human | Forward: AAAGAGATGCACGTCTGCAC                                       | 147 |



|                                    |       |                                 |  |
|------------------------------------|-------|---------------------------------|--|
| for DHX9<br>RIP assay              |       | Reverse: GCAGAAACTGCTGAAGGGTG   |  |
| DHX9<br>siRNA1                     | Human | GAGUGUAACAUCGUAGUAA             |  |
| DHX9<br>siRNA2                     | Human | CCCUGUCACUUGUCAGACA             |  |
| ADAR1<br>siRNA1                    | Human | GAAGACAGCAACUCCACAUCU           |  |
| ADAR1<br>siRNA2                    | Human | GUGCUUCAACACUCUGACUAA           |  |
| CDK1<br>siRNA                      | Human | GGAAUCUUUACAGGACUAUAA           |  |
| CCNB1<br>siRNA                     | Human | GUGACUGACAACACUUAUACU           |  |
| RPS6<br>siRNA                      | Human | GAGAGGGAAAGUUAGGUCAUA           |  |
| CCT2<br>siRNA                      | Human | GGACCCAAAGGCAUGGACAAA           |  |
| ATP5B<br>siRNA                     | Human | GUGAGAGCACAGUAAGGACUA           |  |
| FSCN1<br>siRNA                     | Human | GAUCCAGUUCGGCCUCAUCAA           |  |
| circBNC2<br>siRNA                  | Mouse | GAAGCAGAGACAGGACGCU             |  |
| circBNC2<br>junction-site<br>probe | Human | TTGCCAGCAGCATCCTGTCTCGGCTT-DIG  |  |
| circBNC2<br>Exon 2<br>probe        | Human | TTAGATCACTGACTGGGGCAGAATTC-DIG  |  |
| circBNC2<br>probe                  | mouse | TTGCCAGCAGCGTCCTGTCTCTGCTT-DIG  |  |
| BNC2 probe                         | mouse | TTGCACATGATCCCACCATTGCTCCCA-DIG |  |
| U6 probe                           | Human | CACGAATTTGCGTGTTCATCCTT-DIG     |  |
| ACTB probe                         | Human | CTCATTGTAGAAGGTGTGGTGCCA-DIG    |  |

**Supplementary Table 3. Characteristics of patients with biopsy-proven IRI- or AAN-induced kidney fibrosis**

| Characteristics                  | Kidney fibrosis       |                                    |
|----------------------------------|-----------------------|------------------------------------|
|                                  | IRI-induced<br>(n=12) | Aristolochic acid-induced<br>(n=4) |
| Male, n (%)                      | 5 (41.7 %)            | 3 (75 %)                           |
| Female, n (%)                    | 7 (58.3 %)            | 1 (25 %)                           |
| Age at biopsy, years             | 35.3 ± 7.8            | 60.3 ± 7.9                         |
| Systolic blood pressure, mm Hg   | 122.5 ± 8.0           | 118.8 ± 5.2                        |
| Diastolic blood pressure, mm Hg  | 72.9 ± 15.8           | 87.0 ± 9.7                         |
| Serum creatinine, µmol/L         | 147.6 ± 22.2          | 148.8 ± 12.1                       |
| eGFR, ml/min/1.73 m <sup>2</sup> | 45.5 ± 9.4            | 41.0 ± 7.5                         |
| Urinary protein excretion, g/day | 1.8 ± 1.1             | 1.4 ± 0.6                          |
